# Supplementary material for: Test anxiety among medical students in Egypt: prevalence, associated factors, and coping strategies - A national cross-sectional study
Source: Research Square preprint supplement (doi:10.21203/rs.3.rs-8569897/v1), 2026-02-05
Supplement: Supplementary file 1 [file f42edae23a2293db08a03794.docx]

**Questionnaire**

**Test Anxiety Among Medical Students in Egypt**

**Sociodemographics**

This section will help us to assess the relationship between sociodemographic factors and test anxiety.

**Age: * (required)**

Please write your age: ________

**Academic year: * (required)**

☐ 1st year

☐ 2nd year

☐ 3rd year

☐ 4th year

☐ 5th year

**Sex: * (required)**

☐ Male

☐ Female

**Place of residence: * (required)**

☐ Urban (City)

☐ Rural (Countryside)

**University: * (required)**

☐ Alexandria University

☐ Cairo University

☐ Port Said University

☐ Mansoura University

☐ Minia University

☐ Assiut University

☐ Aswan University

**Associated factors**

This section will help us to assess the relationship between some possible associated factors and test anxiety.

**When are you filling out this form in relation to your exam period? * (required)**

☐ Within one week prior to the commencement of exam period

☐ During the exam period

☐ Within one week after the end of exam period

Exam period means "the designated week or weeks during which you take your exams"

**Type of these exams: * (required)**

☐ Theoretical exams (MCQ, written, etc)

☐ Practical exams (OSCE, OSPE, etc)

☐ Both

**Timing of these exams: * (required)**

☐ Midterm exams

☐ Final exams

**When do you start studying for exams? * (required)**

☐ Well in advance (from the first day of the semester)

☐ With sufficient time left (weeks before the exam)

☐ Last-minute preparation (a few days or the night before the exam)

**Are you satisfied with your academic performance? * (required)**

☐ Yes, I am satisfied

☐ Somewhat satisfied

☐ No, I am not satisfied

**Where do you study most of the time? * (required)**

☐ Home

☐ Library

☐ Cafe

☐ College dormitories

**Do you study alone or with a group? * (required)**

☐ Alone

☐ With a group

**Do you often set a plan before studying? * (required)**

☐ Yes, I do

☐ No, I do not

**Do you take private courses to help prepare for your exams? * (required)**

☐ No, I never take courses

☐ Yes, I take in some subjects

☐ Yes, I take in all subjects

**How often do you attend your college per week? * (required)**

☐ 1 time per week

☐ 2 times per week

☐ 3 times per week

☐ 4 times per week

☐ 5 times per week

☐ 6 times per week

☐ 7 times per week

**Do you participate in extracurricular activities (sports, clubs, arts, volunteer work.....etc.)? * (required)**

☐ Yes, I do

☐ No, I do not

**Do you have a part time job? * (required)**

☐ Yes, I do

☐ No, I do not

**On average, how many hours of sleep do you get in the nights leading up to an exam? * (required)**

Please write the number of hours: ________

**On average, how many hours do you dedicate to studying in the days leading up to an exam? * (required)**

Please write the number of hours: ________

**Test Anxiety**

The English version of the Westside Test Anxiety Inventory (WTAI) was used here

**Psychological distress**

The English version of the ten-item Kessler Psychological Distress Scale (K10) was included here

**Coping Strategies**

**What strategies do you typically use to cope with anxiety before exams? * (required)**

☐ Exercises or sports

☐ Sitting alone in a quiet place

☐ Religious practices

☐ Deep breathing

☐ Muscle relaxation techniques

☐ Distraction techniques

☐ Visualization techniques

☐ Procrastination

☐ Healthy eating

☐ More eating

☐ More fast food consumption

☐ Adequate sleep

☐ More sleeping

☐ Time management and study planning

☐ More usage of social media

☐ Gaming

☐ Participating in study groups

☐ Seeking social support from friends and family

☐ Spending time with friends

☐ Isolation / Social withdrawal

☐ Positive self-talk

☐ Self-blame

☐ Mindfulness

☐ Meditation

☐ Aromatherapy

☐ Listening to music

☐ Taking breaks during study sessions

☐ Taking analgesics

☐ Drug abuse

☐ Smoking/Vaping

☐ Taking a shower

☐ Engaging in my hobbies

☐ Reading & writing

☐ Drawing

☐ Watching TV/movies

☐ Crying

☐ Humour

☐ Denial

☐ Cleaning house/room

☐ Shopping

☐ Others: Please specify: ________
